# Supplementary material for: Suppressive effects of the supercritical-carbon dioxide fluid extract of Chrysanthemum indicum on chronic unpredictable mild stress-induced depressive-like behavior in mice
Source: Royal Society of Chemistry journal article supplement (doi:10.1039/c8fo02474j), 2019-01-01
Supplement: c8fo02474j1.pdf [file c8fo02474j1.pdf]

Supplementary Tab. S1

**Tab. S1 The chemical profile of SEC analyzed by GC-MS analysis and the relative percentage calculated by the integrated peak area**

| No. | Components                      | R.t. <sup>a</sup> | K.I. <sup>b</sup> | Percentage (%) <sup>c</sup> |
|-----|---------------------------------|-------------------|-------------------|-----------------------------|
| 1   | camphene                        | 4.18              | 818.6             | 0.475                       |
| 2   | $\beta$ -cymene                 | 5.25              | 1027.5            | 0.998                       |
| 3   | eucalyptol                      | 5.40              | 1056.6            | 3.091                       |
| 4   | linalool oxide                  | 6.19              | 1128.3            | 0.521                       |
| 5   | $\alpha$ -thujone               | 6.97              | 1169.2            | 2.186                       |
| 6   | $\beta$ -thujone                | 7.24              | 1183.0            | 2.169                       |
| 7   | isothujol                       | 7.68              | 1204.5            | 1.094                       |
| 8   | L-pinocarveol                   | 7.89              | 1214.6            | 0.765                       |
| 9   | d-camphor                       | 8.07              | 1223.4            | 8.582                       |
| 10  | cis-verbenol                    | 8.53              | 1244.6            | 4.720                       |
| 11  | endo-borneol                    | 8.72              | 1253.5            | 7.845                       |
| 12  | L-4-terpineol                   | 9.06              | 1269.6            | 1.634                       |
| 13  | $\alpha$ -terpineol             | 9.49              | 1289.5            | 1.022                       |
| 14  | myrtenol                        | 9.72              | 1300.4            | 1.054                       |
| 15  | cumaldehyde                     | 11.43             | 1353.1            | 0.486                       |
| 16  | bornyl acetate                  | 13.59             | 1411.0            | 2.948                       |
| 17  | thymol                          | 13.81             | 1415.5            | 3.071                       |
| 18  | $\beta$ -caryophyllen           | 20.97             | 1548.8            | 3.336                       |
| 19  | cis- $\beta$ -farnesene         | 23.02             | 1587.9            | 2.270                       |
| 20  | $\alpha$ -curcumene             | 24.26             | 1615.7            | 5.932                       |
| 21  | $\delta$ -cadinene              | 26.10             | 1663.1            | 1.815                       |
| 22  | spathulenol                     | 28.44             | 1728.0            | 1.362                       |
| 23  | caryophyllene oxide             | 28.67             | 1735.2            | 8.460                       |
| 24  | $\gamma$ -eudesmol              | 29.93             | 1774.3            | 1.568                       |
| 25  | T-muurolol                      | 31.19             | 1815.1            | 1.487                       |
| 26  | $\alpha$ -gurjunene             | 31.60             | 1832.5            | 2.161                       |
| 27  | aromandendrene                  | 31.71             | 1834.5            | 2.280                       |
| 28  | $\alpha$ -bisabolol             | 32.53             | 1848.9            | 2.289                       |
| 29  | cubenol                         | 33.04             | 1880.1            | 1.742                       |
| 30  | longifolenaldehyde              | 33.34             | 1890.6            | 2.572                       |
| 31  | $\alpha$ -bisabolol oxide       | 33.96             | 1913.3            | 2.600                       |
| 32  | hexahydrofarnesyl<br>acetone    | 35.70             | 1981.3            | 1.212                       |
| 33  | ethyl hexadecanoate             | 37.67             | 2069.6            | 1.362                       |
| 34  | $\alpha$ -linolenic acid        | 38.82             | 2129.8            | 2.130                       |
| 35  | ethyl octadec-9,12-<br>dienoate | 39.45             | 2145.0            | 2.470                       |

- a** Retention time (min).
- b** Kovats index relative to n-alkanes (C<sub>6</sub>–C<sub>30</sub>) on HP-5MS column.
- c** Relative percentage calculated by integrated peak area in Agilent MSD Chemstation data analysis program.

GC-MS analysis: GC-MS was carried out on an Agilent 6890-5975 GC-MS system consisting of an Agilent 6890 Gas Chromatography instrument, a 5975 Mass Spectrometer, and an Agilent ChemStation software (Agilent, Palo Alto, USA). Chromatographic separation was achieved on a 5% phenyl methyl siloxane HP-5MS capillary column (30 m × 0.25 mm inner diameter, 0.25 μm film). The oven temperature was set initially at 60°C followed by a gradient of 10°C/min up to 100°C (held for 1 min) and then programmed to 110°C at 1°C/min (held for 1 min); furthermore, the temperature was up to 150°C at 3°C/min (held for 1 min) and finally to 260°C at 10°C/min (held for 5 min). Split injection (0.5 μL) was conducted, and helium was used as carrier gas of 1.0 mL/min flow rate. The spectrometer was set in electron-impact (EI) mode, the ionization energy was 70 eV, the scan range was 40-400 amu, and the scan rate was 0.34 s per scan. The inlet, ionization source temperatures were 230°C and 250°C, respectively. Identification of the compounds was based on a comparison of retention indices (relative to the retention times of n-alkanes on the HP-5MS column) and mass spectra with those of authentic samples, data from, the Wiley/NBS Registry of Mass Spectral Data (V.5.0), and the National Institute of Standards and Technology (NIST), and the MS Search (2011, V.2.0). The relative percentage of each compound in the n-hexane layer of SEC was quantified based on the peak area integrated by the analysis program.

**Tab. S2 The chemical profile of SEC analyzed by HPLC-PAD analysis and the relative percentage calculated by the integrated peak area**

| <b>Number</b> | <b>Components</b>    | <b>Percentage (mg/g) <sup>a</sup></b> |
|---------------|----------------------|---------------------------------------|
| 1             | Chlorogenic acid     | 21.1                                  |
| 2             | Luteolin-7-glucoside | 22.8                                  |
| 3             | Linarin              | 48.3                                  |
| 4             | Luteolin             | 11.4                                  |
| 5             | Acacetin             | 8.8                                   |

**a** The content of compounds was quantitatively analyzed with peak areas under the standard curves at 334 nm.

HPLC analysis: HPLC was carried out on a Shimadzu LC-20A HPLC system consisting of a SPD-M20A PDA detector, a LC-20AT pump, a SIL-20AC automatic sampler, and a CTO-20A thermostatic column compartment (Shimadzu, Kyoto, Japan). The separation was performed on a Gemini C18 column (4.6 × 150 mm, 5 μm, Phenomenex Inc., CA, USA) with a flow rate of 1.0 mL/min, column temperature at 30°C, and injection volume of 5 μL. The mobile phase consisted of acetonitrile (solvent A), and 0.1% aqueous formic acid (solvent B) was used to elute the targets with the gradient mode (0–10 min: 5% A15% A; 10–25 min: 15% A30% A; 25–35 min: 30% A; 35–40 min: 30% A50% A). Analysis based on the retention time and the ultraviolet (UV) absorption (190 to 800 nm) clearly authenticated the presence of chlorogenic acid, luteolin-7-glucoside, linarin, luteolin, and acacetin. The content of these compounds was quantitatively analyzed with peak areas under the standard curves at 334 nm.

**Table S1. Primers used in qPCR assay**

| <b>Gene</b>    | <b>Forward primer (5'→3')</b> | <b>Reverse primer (5'→3')</b> |
|----------------|-------------------------------|-------------------------------|
| TNF- $\alpha$  | CCTATGTCTCAGCCTCTTCT          | CCTGGTATGAGATAGCAAAT          |
| IL-1 $\beta$   | GGCAACTGTTCCCTGAACTCAACTG     | CCATTGAGGTGGAGAGCTTTCAGC      |
| IL-6           | CCACTTCACAAGTCGGAGGCTT        | CCAGCTTATCTGTTAGGAGA          |
| GAPDH          | ATGTACGTAGCCATCCAGGC          | AGGAAGGAAGGCTGGAAGAG          |
| $\beta$ -actin | AGCCATGTACGTAGCCATCC          | GCTGTGGTGGTGAAGCTGTA          |
